# Supplementary material for: Ultrathin BiVO4 nanobelts: controllable synthesis and improved photocatalytic oxidation of water
Source: Royal Society of Chemistry journal article supplement (doi:10.1039/c6ra15566a), 2016-01-01
Supplement: c6ra15566a1.pdf [file c6ra15566a1.pdf]

**Supporting Information for**

**Ultrathin BiVO<sub>4</sub> Nanobelts: Controllable Synthesis and Improved  
Photocatalytic Oxidation of Water**

Zhengbo Jiao,<sup>a,b,\*</sup> Hongchao Yu,<sup>a</sup> Xuesen Wang,<sup>b</sup> and Yingpu Bi<sup>a,\*</sup>

<sup>a</sup>State Key Laboratory for Oxo Synthesis & Selective Oxidation (OSSO), and National Engineering Research Center for Fine Petrochemical Intermediates (NERC-FPI), Lanzhou Institute of Chemical Physics, CAS, Lanzhou 730000, China.

<sup>b</sup>Department of Physics, National University of Singapore, 117542 Singapore.

\*To whom correspondence should be addressed.

Email: [jiaozhb@licp.cas.cn](mailto:jiaozhb@licp.cas.cn); [yingpubi@licp.cas.cn](mailto:yingpubi@licp.cas.cn)

## Experimental Section

**Chemical Reagents and Instruments:** Ammonium metavanadate ( $\text{NH}_4\text{VO}_3$ ), bismuth nitrate ( $\text{Bi}(\text{NO}_3)_3$ ), ammonia ( $\text{NH}_3 \cdot \text{H}_2\text{O}$ ), nitric acid ( $\text{HNO}_3$ ), methanol ( $\text{CH}_3\text{OH}$ ), silver nitrate ( $\text{AgNO}_3$ ) were purchased from Sinopharm Chemical Reagent Co., Ltd. Deionized water (18 M $\Omega$ , Molecular) was used for all solution preparations.

The morphology and size of the as-prepared products were characterized by using a field-emission scanning electron microscope (JSM-6701F, JEOL). The X-ray diffraction spectra (XRD) measurements were performed on a PANalytical X'Pert PRO instrument using Cu K $\alpha$  radiation (40 kV). The XRD patterns were recorded from 10° to 90° with a scanning rate of 0.067 °/s. UV-visible diffuse reflectance spectra were taken on a UV-2550 (Shimadzu) spectrometer by using  $\text{BaSO}_4$  as the reference. HRTEM imaging was carried out using an FEI Tecnai TF20 microscope operated at 200 kV.

**Preparation of  $\text{BiVO}_4$  nanobelts:** Firstly, 0.036 g  $\text{NH}_4\text{VO}_3$  was dissolved in 1 M ammonia solution (solution A) because it is slight soluble in pure water. 0.03 g  $\text{BiNO}_3$  was dissolved into 1 M dilute nitric acid (solution B) since it could hydrolyze to  $\text{BiONO}_3$  precipitates in aqueous solution. Secondly, solution A was added into solution B drop by drop. Along with the consumption of ammonia and nitric acid,  $\text{NH}_4\text{VO}_3$  and  $\text{BiNO}_3$  would react and produce tetragonal  $\text{BiVO}_4$  nanoparticles. The PH is measured to be 5.1 after the full mixture of solution A with solution B. At last, the solution was transferred into a Teflon-lined stainless steel autoclave, which was kept at 180 °C for one day. After the hydrothermal reaction, the  $\text{BiVO}_4$  nanobelts were obtained finally.

**Preparation of  $\text{BiVO}_4$  nanoparticles:** The pure  $\text{BiVO}_4$  nanoparticles was synthesized via a typical procedure, 1 mmol of  $\text{Bi}(\text{NO}_3)_3 \cdot 5\text{H}_2\text{O}$  and 1mmol of  $\text{NH}_4\text{VO}_3$  was added to 30 mL of 2 M nitric acid solution at room temperature and remained continuous stirring for 30 minutes. Then, an appropriate amount of  $\text{NH}_4\text{OH}$  (25~28%) was also added into the prepared solution to fit the pH value to 8. After stirring for 30 min, a clear orange solution was obtained. This solution was poured into a 50 mL Teflon-lined autoclave and maintained at 180°C for 24 h under autogenous pressure, and then naturally cooled to room temperature. The resulting precipitates were collected and washed with ethanol and deionized water thoroughly and dried at 80°C in air.

**Photoelectrochemical measurements:** The  $\text{BiVO}_4$  nanobelts suspended in water and the

mixtures were ultrasonically scattered for 15 min to form homogeneous solution. Then, the solution was spin coated on a Fluorine-doped tin oxide (FTO) substrate with a rate of 300 rpm for 30 s. This procedure was repeated for 3 times. Photoelectrochemical properties were measured in a three-electrode configuration. A Pt foil, saturated calomel electrode (SCE), and 0.2 M sodium sulfate with methanol were used as the counter-electrode, the reference electrode, and the electrolyte, respectively. The current-time (i-t) curves were collected at 0.4 V vs SCE. A 300 W Xe lamp was utilized as the light source.

**Photocatalytic reactions:** The photocatalytic O<sub>2</sub> evolution was carried out with 0.3 g photocatalyst suspending in AgNO<sub>3</sub> solution in a Pyrex glass reaction cell. The reaction cell was connected to a gas-closed system with a gas-circulated pump. A 300 W Xe arc lamp was employed for the light source of photocatalytic reaction. The evolved O<sub>2</sub> was analyzed by an online gas chromatograph (GC-8A; Shimadzu Corp., Japan) equipped with a thermal conductivity detector.

### Additional Figures

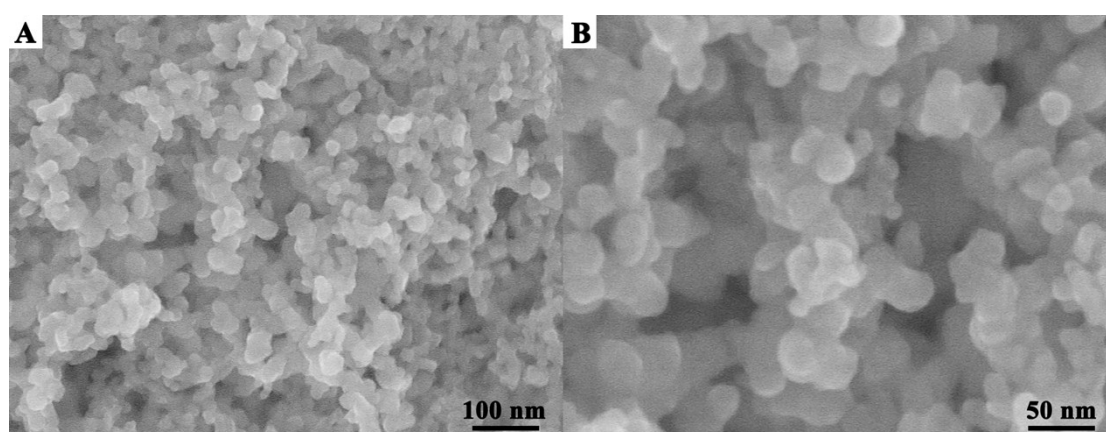

**Fig. S1.** SEM images of BiVO<sub>4</sub> nanoparticles before hydrothermal reaction.

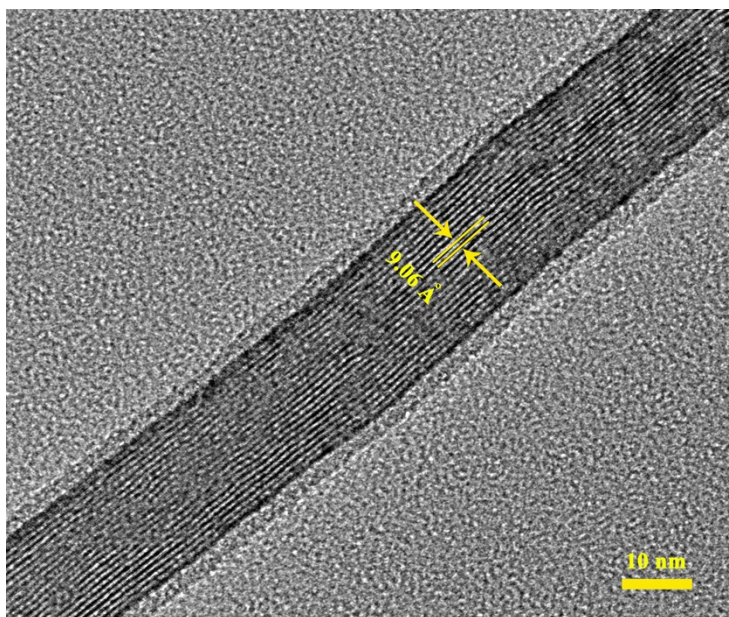

**Fig. S2.** Sideview TEM image of BiVO<sub>4</sub> nanobelts.

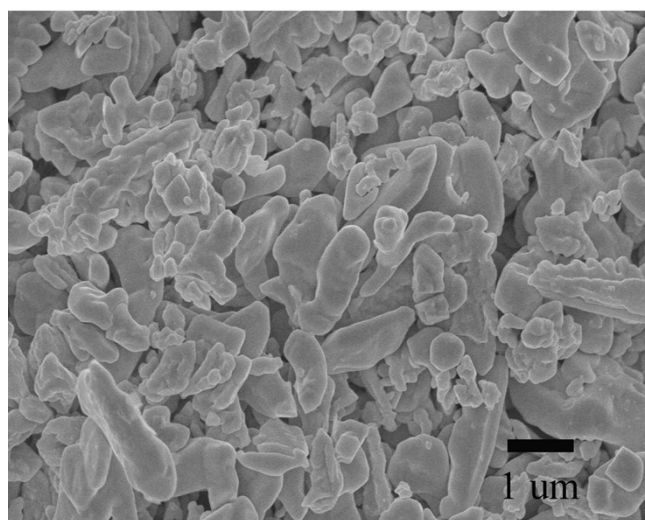

**Fig. S3.** SEM image of BiVO<sub>4</sub> nanoparticles.

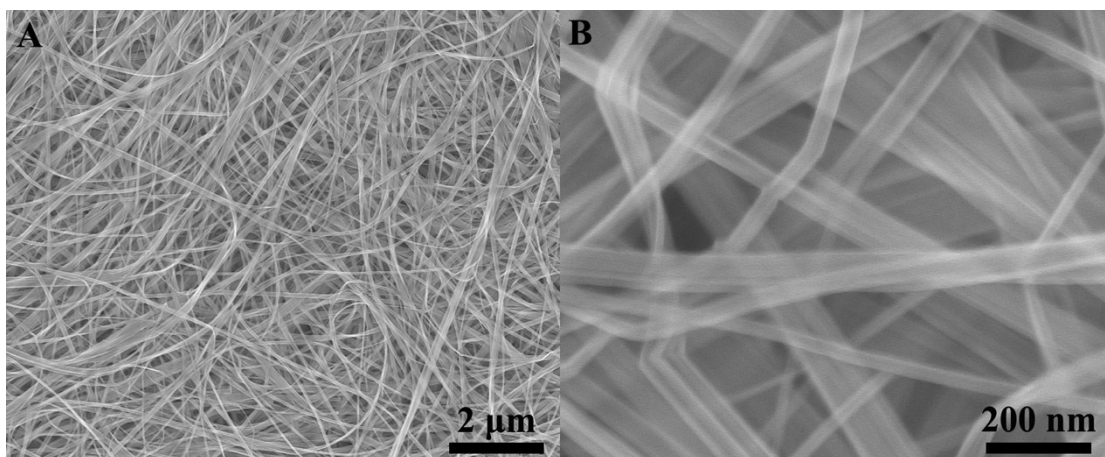

**Fig. S4.** SEM images of ultrathin BiVO<sub>4</sub> nanobelts after photocatalytic oxidation of water.
